# Supplementary material for: Investigating the change in gene expression profile of blood mononuclear cells post-laparoscopic sleeve gastrectomy in Chinese obese patients
Source: Front Endocrinol (Lausanne). 2023 Mar 14;14:1049484. doi: 10.3389/fendo.2023.1049484 (PMC10043499; doi:10.3389/fendo.2023.1049484)
Supplement: Supplementary Table 7 — The enriched KEGG pathways related to IRF1 from the single-gene Gene set enrichment analysis (GSEA). [file Table_7.xlsx]

## Sheet: Sheet1
ID	Description	setSize	enrichmentScore	NES	pvalue	p.adjust	qvalues	rank	leading_edge	core_enrichment
hsa04060	Cytokine-cytokine receptor interaction	278	0.390048	2.43476	1e-10	1.645e-08	1.15263e-08	2983	tags=32%, list=15%, signal=27%	6364/3553/2921/388372/7852/2658/3576/1233/2920/7850/3557/3552/6372/2919/9180/58191/84957/1230/3976/355/27178/5008/3623/7293/3569/50616/8744/6357/1271/7124/6347/1435/8794/6363/6349/3625/27302/1440/269/3558/3577/6354/3556/56300/51561/392255/3626/59067/1437/3460/970/6360/3458/3592/944/3554/3579/26525/3561/7292/7040/4838/8784/3559/1439/246778/3459/3574/51554/51330/8809/53342/9966/29949/1236/643/650/5…
hsa05168	Herpes simplex virus 1 infection	480	-0.38529	-1.76272	1e-10	1.645e-08	1.15263e-08	5265	tags=44%, list=27%, signal=32%	8892/347344/342926/10838/7132/100131017/284459/57335/356/9831/84503/6426/55769/90075/55552/7773/10379/81931/3455/581/345462/27300/8891/147686/9641/126070/1978/9310/7571/5501/57343/3442/440275/389114/92595/342908/152687/353355/3661/26149/7755/115004/65243/388559/30832/163087/90333/100289635/5199/84775/84914/169270/84765/79788/284307/163081/374928/162967/126017/54106/285267/163131/84671/147657/1461…
hsa04610	Complement and coagulation cascades	84	0.493652	2.54011	4.08753e-10	4.48266e-08	3.14095e-08	3802	tags=54%, list=20%, signal=43%	2152/1604/5329/728/2/3426/966/735/3078/5328/81494/2243/5055/731/729/2165/710/730/722/2244/3080/2147/3053/2158/5627/1361/2266/10878/4153/7056/716/7448/5340/462/2161/718/5327/629/732/4179/3827/2151/10877/2160/3075
hsa04714	Thermogenesis	214	-0.435653	-1.90379	4.55212e-09	3.14197e-07	2.20154e-07	5097	tags=45%, list=26%, signal=34%	64223/513/374291/6389/64764/518/1537/7384/90993/5562/53632/4706/4715/60/4709/10891/55811/521/1345/5567/515/1329/5593/84335/353500/6654/27089/4714/5564/6605/111/7381/498/3991/4723/6197/71/28958/113/29796/788/4707/6391/9167/4701/10975/4708/126328/4718/23028/517/1355/1340/9551/6603/65260/4711/522/509/6604/4728/4697/51287/656/5571/10476/516/5565/51780/1385/1352/86/4724/6601/7249/4716/539/10632/1350/4…
hsa04061	Viral protein interaction with cytokine and cytokine receptor	96	0.449252	2.38958	4.77503e-09	3.14197e-07	2.20154e-07	2983	tags=38%, list=15%, signal=32%	6364/2921/388372/7852/3576/1233/2920/6372/2919/1230/27178/3569/6357/7124/6347/1435/8794/6363/6349/3558/3577/6354/6360/3579/3561/3559/51554/8809/29949/1236/643/53832/3627/9547/6348/6375
hsa04668	TNF signaling pathway	111	0.410168	2.23708	6.94327e-09	3.80723e-07	2.66768e-07	2033	tags=32%, list=11%, signal=28%	3659/6364/3553/2921/5743/602/7412/7128/5295/2920/1051/3383/6372/2919/1326/3976/355/4792/5970/3569/4217/7124/6347/1435/1906/9530/5606/1437/84699/7185/4790/9021/1388/10488/8809
hsa04625	C-type lectin receptor signaling pathway	103	0.43024	2.32741	1.1631e-08	5.071e-07	3.55319e-07	2446	tags=34%, list=13%, signal=30%	3659/1960/3553/8915/5743/602/114548/1263/9261/5295/26253/5534/4792/5970/3569/4791/1540/7124/3558/5971/51561/4893/5894/3592/4790/22800/5533/5530/53342/5535/6772/4193/5290/23365/1959
hsa05323	Rheumatoid arthritis	90	0.448714	2.35568	1.23307e-08	5.071e-07	3.55319e-07	2999	tags=39%, list=16%, signal=33%	6364/3553/2921/3576/1493/2920/3383/3552/6372/2919/527/3569/7124/2321/6347/102723407/1435/6349/941/245973/51561/1437/3458/940/7010/7040/3123/3117/3127/3119/4312/533/6348/7099/3126
hsa05321	Inflammatory bowel disease	65	0.509765	2.44569	1.39727e-08	5.10781e-07	3.57898e-07	4091	tags=55%, list=21%, signal=44%	3553/3552/5970/3569/50616/7124/3558/51561/59067/3460/3458/3592/6095/4790/4094/3561/6774/7040/3123/3459/8809/6772/3117/3127/3119/6775/50615/7099/3126/2625/7097/3596/7042/3725/50943/3593
hsa04657	IL-17 signaling pathway	90	0.440581	2.31298	2.84652e-08	9.36506e-07	6.56198e-07	1536	tags=29%, list=8%, signal=27%	6364/3553/2921/5743/7128/3576/2920/5597/1051/6372/2919/4792/5970/3569/7124/6347/1440/7189/6354/3727/4322/9618/1437/8061/3458/4790
hsa04940	Type I diabetes mellitus	41	0.574072	2.53137	8.59429e-08	2.57047e-06	1.8011e-06	3202	tags=49%, list=17%, signal=41%	3553/3552/355/7124/3558/941/3458/3592/5799/940/3123/1363/3117/3127/3119/2571/3329/3126/3133/3105
hsa00190	Oxidative phosphorylation	114	-0.477438	-1.96685	1.65046e-07	4.52501e-06	3.17062e-06	5053	tags=50%, list=26%, signal=37%	513/374291/6389/518/528/1537/7384/4706/4715/4709/521/1345/515/1329/27089/27068/535/4714/7381/498/4723/64077/29796/4707/6391/9167/4701/10975/4708/126328/4718/517/1355/1340/9551/4711/522/509/4728/4697/10476/516/1352/4724/4716/539/10632/1350/4713/4720/4731/1353/4702/90423/54539/23545/4717
hsa05417	Lipid and atherosclerosis	210	0.307292	1.82594	1.95998e-07	4.96025e-06	3.47559e-06	3294	tags=31%, list=17%, signal=26%	3553/2921/114548/7412/6648/5295/3576/2920/3383/2919/19/5534/4780/355/148022/4792/5970/3309/3569/337/4217/7124/3949/6347/6349/9619/9451/54205/7189/10010/5606/4893/1649/3592/4790/6774/338/22926/998/1548/5533/637/3320/3929/5530/5535/5468/3326/816/5290/4973/4689/4312/23118/23643/1555/4067/6348/3329/958/7099/1147/8795/1559/3303/3665
hsa05134	Legionellosis	56	0.495241	2.33582	3.89416e-07	9.15127e-06	6.41218e-06	1536	tags=34%, list=8%, signal=31%	3553/2921/5861/3576/375/2920/2919/56681/4792/5970/7415/3569/1917/4791/7124/10767/54205/3592/4790
hsa04659	Th17 cell differentiation	106	0.384833	2.08184	7.22336e-07	1.58432e-05	1.11012e-05	3122	tags=40%, list=16%, signal=33%	3553/196/3091/5534/4794/4792/5970/3569/50616/3558/3556/51561/59067/3460/3458/6095/3554/4790/3561/6774/7040/3123/5533/3559/3459/3320/5530/53342/5588/5535/3326/6772/3117/3127/5914/3119/3662/50615/6777/3126/2625/1147
hsa01240	Biosynthesis of cofactors	151	-0.437825	-1.859	8.45946e-07	1.73948e-05	1.21883e-05	5088	tags=46%, list=26%, signal=34%	250/1719/2730/145226/57026/169355/55191/55312/4522/2729/51109/5315/27430/4832/6472/4351/133686/217/56474/2058/125061/2356/204/10229/2990/8566/211/27235/79001/1355/7389/124454/53354/23498/3145/79717/7358/5373/7360/122622/2677/51805/51004/9054/11019/200895/7372/154807/1352/7390/10327/84274/64802/1723/158/587/10201/80308/55163/790/210/224/326625/29926/2937/1371/5498/80347/80025
hsa03010	Ribosome	131	-0.44949	-1.87912	1.47224e-06	2.84921e-05	1.99641e-05	5834	tags=51%, list=30%, signal=36%	6175/6209/9045/6206/6228/100529097/6224/6207/6157/6159/6235/11224/9553/6143/4736/6187/6160/6137/6165/6135/6169/6217/6201/28998/6227/51023/6136/6132/6164/11222/6202/6155/2197/25873/9801/6234/6128/51065/9349/54948/6167/65003/6138/6146/6154/63931/64965/51073/64968/51081/55052/51069/6176/51021/51263/63875/64979/6229/79590/51116/64981/29074/29088/54460/64963/64969/51318
hsa05167	Kaposi sarcoma-associated herpesvirus infection	189	0.295628	1.72898	1.77141e-06	3.20874e-05	2.24833e-05	2473	tags=23%, list=13%, signal=21%	2921/5743/1499/3091/9261/5295/3576/1233/9976/2920/3383/2919/5534/1230/84557/7538/2033/355/148022/4792/5970/3569/54205/1387/4893/1437/285/5894/4790/6774/81631/5533/637/643246/1026/3459/4609/23533/5530/5535/6772/5290/57580/5294
hsa00280	Valine, leucine and isoleucine degradation	47	-0.57614	-2.0927	1.93902e-06	3.20874e-05	2.24833e-05	3992	tags=68%, list=21%, signal=54%	223/594/3033/217/197322/11112/10449/4329/56922/5096/3030/38/1629/593/84693/30/4594/36/18/64087/26275/3028/65985/3032/35/34/3155/1892/587/224/27034/3712
hsa01200	Carbon metabolism	111	-0.467569	-1.92162	1.9506e-06	3.20874e-05	2.24833e-05	5047	tags=63%, list=26%, signal=47%	2653/29968/5226/2645/80201/4967/2203/729020/5091/26227/2746/7086/5223/2597/113675/2875/84706/128/6389/2539/5723/5162/2023/8803/5315/6472/22934/3419/9563/441531/7167/847/26007/50/4329/3098/5160/84532/275/4190/5096/1737/5634/6391/38/4199/6120/4200/84693/4191/4594/132158/3417/2271/3421/26275/25796/2806/283871/2821/8802/35/1892/5211/8310/3101/55902/414328/1431/2098
hsa00640	Propanoate metabolism	34	-0.620932	-2.12103	3.11621e-06	4.88207e-05	3.42081e-05	3246	tags=56%, list=17%, signal=47%	4329/84532/5096/3030/38/1629/593/84693/4594/55862/18/26275/8802/35/1892/8310/160287/55902/23417
hsa04064	NF-kappa B signaling pathway	104	0.37593	2.03628	3.72584e-06	5.57182e-05	3.90411e-05	1536	tags=26%, list=8%, signal=24%	3553/2921/8915/5743/597/388372/7412/7128/3576/2920/3383/2919/148022/4792/5970/4791/6357/1540/7124/102723407/6363/7189/5971/5328/3554/7185/4790
hsa00970	Aminoacyl-tRNA biosynthesis	42	-0.586329	-2.07867	4.87011e-06	6.96638e-05	4.88126e-05	4890	tags=60%, list=25%, signal=45%	4141/57505/51091/79587/2058/10056/3376/92935/1615/5917/55699/124454/80222/16/4677/3035/5188/55157/123263/51520/6301/23438/25973/5859/2193
hsa04010	MAPK signaling pathway	285	0.254075	1.58144	9.49416e-06	0.000130149	9.11939e-05	2208	tags=22%, list=11%, signal=20%	3553/1846/1847/9261/9693/1844/5494/3552/5534/1326/2872/355/8649/5970/374/5568/6722/4791/84867/4217/7124/2321/1435/7189/1943/9175/3556/5971/1850/7039/5606/3727/4893/2069/1649/5921/285/5894/6789/1843/3554/10746/26291/7010/4790/22800/9448/7040/5778/998/9479/5533/3479/1848/4214/774/777/4609/11221/5530/5535/5156
hsa05146	Amoebiasis	101	0.355149	1.90791	1.94524e-05	0.000255993	0.000179371	1696	tags=27%, list=9%, signal=25%	3553/2921/5295/3576/2920/7850/2919/5970/5568/1288/5868/3909/3569/3914/7124/102723407/735/1437/3458/3592/2769/3554/731/4790/1277/5272/7040
hsa05202	Transcriptional misregulation in cancer	179	0.282615	1.63108	2.3188e-05	0.000293418	0.000205594	2443	tags=26%, list=13%, signal=23%	597/64332/3576/7850/1051/221037/5970/3569/3021/51513/4291/2321/102723407/6935/8013/904/7030/5966/3020/3207/5328/7102/2118/1649/1437/5218/7185/4790/4094/604/8864/3479/894/3398/7403/1848/1026/2530/4609/51804/7709/5077/5468/4193/5914/2308
hsa05140	Leishmaniasis	75	0.378136	1.86402	3.23486e-05	0.000394174	0.000276193	2999	tags=36%, list=16%, signal=31%	3553/5743/3552/4792/5970/1917/2215/7124/102723407/65108/7189/3460/3458/3592/4790/7040/3123/3459/6772/3117/3127/3119/4689/23118/2212/7099/3126
hsa05152	Tuberculosis	175	0.281085	1.63614	3.75276e-05	0.00044095	0.000308968	2999	tags=28%, list=16%, signal=24%	3553/8915/1263/8767/1051/3313/3552/4800/26253/5534/2033/5970/527/5868/3569/2215/7124/102723407/54205/1387/7189/51561/3460/3458/5894/3592/4790/3656/7040/3123/5533/637/3459/3929/5530/5535/6772/816/3117/23365/3127/3119/7421/2212/533/3329/7099/8877/3126
hsa05332	Graft-versus-host disease	39	0.499688	2.17198	4.15109e-05	0.000470934	0.000329978	3202	tags=41%, list=17%, signal=34%	3553/3552/355/3569/7124/3558/941/3458/940/3123/3117/3127/3119/3126/3133/3105
hsa04630	JAK-STAT signaling pathway	154	0.296368	1.68727	4.4573e-05	0.000488817	0.000342508	2955	tags=29%, list=15%, signal=25%	5295/9180/3976/2033/5008/3569/50616/5292/1271/4170/1440/3558/1387/51561/59067/1437/3460/3458/5894/3592/3561/6774/9021/8651/894/3559/1439/316/1026/3459/3574/4609/8027/53342/5156/6772/29949/5290/53832/6775/1441/50615/6777/2690/1270
hsa04514	Cell adhesion molecules	141	0.305211	1.73607	5.3425e-05	0.000566995	0.000397286	3202	tags=29%, list=17%, signal=24%	7412/1493/3383/6385/9378/8516/23562/29126/29851/6382/64101/941/5819/84628/1002/54413/940/10666/1001/1364/9074/50848/3123/102723996/23308/80380/3117/83700/3127/3119/4359/927/6383/1365/925/57689/958/3126/152404/3133/3105
hsa05322	Systemic lupus erythematosus	129	0.299854	1.68319	8.5526e-05	0.000879314	0.000616124	3479	tags=25%, list=18%, signal=20%	474382/3021/2215/7124/102723407/941/94239/735/3020/8347/3458/940/731/6628/729/730/8370/3123/83740/92815/3117/3127/3119/716/2212/958/3126/8334/723790/8349/718/732
hsa04141	Protein processing in endoplasmic reticulum	166	0.279338	1.58425	0.000103131	0.00101208	0.000709149	2707	tags=27%, list=14%, signal=24%	7323/51726/23645/4780/56681/10970/3309/51465/7415/9373/79139/4217/3337/55432/10802/9451/10427/3301/5887/92552/6500/29979/1649/55829/9709/573/2923/7353/22926/102724652/1388/10294/3320/4121/5611/10525/3326/811/23480/55176/7326/10299/51035/9695/51009
hsa05133	Pertussis	75	0.356952	1.7596	0.000104591	0.00101208	0.000709149	1694	tags=24%, list=9%, signal=22%	3659/3553/2773/114548/3576/3552/6372/148022/5970/3569/7124/7189/51561/1073/3592/4790/710/722
hsa05415	Diabetic cardiomyopathy	182	-0.374575	-1.6181	0.000131072	0.00123208	0.000863301	5797	tags=49%, list=30%, signal=35%	4087/207/5164/55967/4705/5728/292/5293/5578/51079/7388/142/2597/5972/1535/7416/291/513/374291/6389/518/1537/2539/1215/7384/4706/9882/5162/4715/4709/5501/1345/515/1329/1536/177/27089/4714/5165/7381/6667/5160/498/5499/5880/4723/29796/4707/3643/6391/9167/4701/10975/4708/126328/4718/517/948/1340/10000/7419/5524/4711/522/509/5465/4728/5332/4697/10476/5296/516/5330/5166/2997/4724/4716/539/1350/4713/293…
hsa04062	Chemokine signaling pathway	187	0.266622	1.56135	0.000142614	0.00130334	0.000913232	3206	tags=27%, list=17%, signal=23%	6364/2773/2921/388372/7852/5295/3576/1233/2920/6372/2919/58191/1230/4792/9844/5970/2309/5568/6357/6347/6363/6349/3577/6354/4893/6360/5894/3579/4790/6774/998/23533/6772/5290/1236/57580/643/5294/3627/25759/4067/6777/9547/6348/6093/6375/2870/1147/2783/54331
hsa03410	Base excision repair	33	-0.571325	-1.93675	0.000168702	0.00150008	0.00105109	3909	tags=55%, list=20%, signal=44%	57804/56655/143/3980/7374/10039/23583/27343/5425/10714/4913/5426/5424/7515/328/4350/27301/4968
hsa05330	Allograft rejection	37	0.468686	1.9873	0.000233393	0.0020207	0.00141588	3202	tags=43%, list=17%, signal=36%	355/7124/102723407/3558/941/3458/3592/940/3123/3117/3127/3119/958/3126/3133/3105
hsa05163	Human cytomegalovirus infection	220	0.245434	1.49738	0.000280401	0.00236544	0.00165743	2360	tags=20%, list=12%, signal=18%	3553/2773/5743/1499/388372/7852/5295/3576/10672/5534/1230/355/4792/5970/5568/3569/5734/7124/2775/6347/6349/54205/4893/5733/6009/5894/84699/3554/2923/3579/4790/6774/5533/637/1388/1026/10488/4609/5530/5535/5156/4193/811/5290/23365
hsa05142	Chagas disease	102	0.312398	1.68568	0.000311813	0.00256466	0.00179703	1956	tags=25%, list=10%, signal=22%	3553/2773/5515/5295/3576/355/148022/4792/5970/3569/7124/2775/6347/6349/3558/7189/3460/3458/3592/2769/5520/4790/7040/5519/3459
hsa04380	Osteoclast differentiation	125	0.293084	1.63869	0.000399023	0.00320191	0.00224354	2842	tags=29%, list=15%, signal=25%	3553/5295/3552/2355/5534/4792/5970/4791/2215/1540/7124/1435/7189/5971/3727/3937/3460/8061/3458/9846/3554/4790/7040/9021/8651/5533/3459/5530/5535/5468/6772/5290/4689/23118/11006/2212
hsa05164	Influenza A	164	0.266777	1.52352	0.000461225	0.00361293	0.00253154	3157	tags=30%, list=16%, signal=26%	3553/114548/5295/3576/293/3383/3552/2033/355/148022/4792/5970/3569/64135/7124/3337/6347/54205/1387/91543/3460/3458/5894/3592/4790/9021/3123/637/3459/5611/6772/5290/3117/3127/3119/4599/4600/29107/3627/5340/3838/5610/7099/7098/23586/3126/390748/1147/23633/8795
hsa04217	Necroptosis	154	0.268625	1.52932	0.000476698	0.0036473	0.00255562	3157	tags=29%, list=16%, signal=24%	3553/124044/114548/25978/7128/9825/293/3552/2495/474382/355/148022/1540/7124/2752/57132/29082/94239/3460/3458/128866/6774/637/7417/3459/3320/81030/83740/27243/3326/6772/816/92815/6775/92421/8837/6777/5610/7099/7098/8334/8878/330/8795
hsa00860	Porphyrin and chlorophyll metabolism	41	-0.506973	-1.78587	0.000537804	0.00389045	0.00272599	3232	tags=37%, list=17%, signal=31%	3162/2990/211/1355/7389/124454/3145/1352/7390/645/3052/210/326625/1371/5498
hsa04933	AGE-RAGE signaling pathway in diabetic complications	98	0.318732	1.70046	0.000538462	0.00389045	0.00272599	2892	tags=29%, list=15%, signal=24%	2152/3553/7412/5295/3576/3383/3552/5970/1288/3569/5292/7124/6347/1906/4893/4790/1277/6774/7040/998/6772/1287/5290/2308/185/7056/5581/6777
hsa00520	Amino sugar and nucleotide sugar metabolism	47	-0.493111	-1.79112	0.000543953	0.00389045	0.00272599	6004	tags=62%, list=31%, signal=43%	1727/55276/3074/5372/2582/5238/54187/7264/4351/1118/91373/3098/197258/64841/55577/8790/7358/2592/5373/7360/2584/3073/5973/2821/55907/10007/3101/606495/29926
hsa00630	Glyoxylate and dicarboxylate metabolism	29	-0.569772	-1.87483	0.00057691	0.00403837	0.00282964	4040	tags=59%, list=21%, signal=46%	6472/847/125061/50/84532/9380/275/4190/5096/38/84693/4191/4594/132158/283871/55902/1431
hsa00130	Ubiquinone and other terpenoid-quinone biosynthesis	11	-0.737707	-1.90769	0.000610155	0.0041821	0.00293035	2977	tags=73%, list=15%, signal=62%	10229/27235/79001/2677/51805/51004/154807/84274
hsa05016	Huntington disease	286	-0.324544	-1.44875	0.000739958	0.00496829	0.00348122	5123	tags=37%, list=26%, signal=27%	2882/10121/513/5707/374291/6389/64764/518/1537/5715/7384/90993/581/7979/4706/1173/4715/5438/5694/4709/10891/1742/1345/515/1329/55102/5431/6908/5719/4899/5710/27089/83544/4714/9706/6507/30849/7381/6667/627/26100/498/25981/317/4723/5686/10126/29796/4707/6391/9167/4701/10975/4708/126328/4718/517/5709/1211/1340/5433/3065/7419/89953/5441/3064/4711/522/5705/509/5289/1175/1639/4728/5332/4697/160/55860/1…
hsa04142	Lysosome	127	-0.381524	-1.58436	0.000761481	0.00501055	0.00351083	5574	tags=46%, list=29%, signal=33%	22901/79158/3074/537/2588/8905/285362/968/26985/53/8722/2519/8763/1508/10717/6272/1203/1522/1777/3425/3373/4668/4074/2720/535/8906/1511/1512/2990/1200/162/1211/6448/4125/1497/2548/23431/4891/6609/175/4126/2517/3073/410/8692/256471/8943/4669/138050/8218/9179/8907/84572/1201/23545/23659/51172/23163
hsa05144	Malaria	50	0.40846	1.8724	0.000820749	0.00529464	0.00370989	1696	tags=26%, list=9%, signal=24%	3553/7057/7412/3576/3383/3569/6382/7124/6347/1440/3458/3592/7040
hsa05130	Pathogenic Escherichia coli infection	191	0.25025	1.44574	0.00087785	0.00555409	0.00389168	3190	tags=28%, list=16%, signal=23%	3553/114548/5861/4628/3576/375/10672/8976/355/23562/4792/5970/3569/7278/7124/102723407/10006/10802/54205/10427/7189/7430/7846/7456/3554/1364/4790/9074/998/2147/4629/8440/84790/837/2846/23365/84617/10376/283446/2017/23118/147945/7277/1365/147179/2212/4641/7099/6093/1147/8795/55971/51807
hsa04146	Peroxisome	81	-0.422764	-1.65902	0.00103543	0.0062492	0.00437874	4053	tags=53%, list=21%, signal=42%	10005/55711/23305/10478/8528/196743/5195/84188/55825/4843/2053/5052/847/8799/5826/8540/84769/8504/390916/55670/83594/5830/5192/30/215/373156/5190/3417/283927/11264/8800/3295/25824/5825/10455/8443/10654/4358/3155/5827/8310/5194/23417
hsa03440	Homologous recombination	41	-0.495274	-1.74466	0.00103565	0.0062492	0.00437874	6724	tags=66%, list=35%, signal=43%	5932/8438/672/7156/4361/472/50511/83990/7979/84142/11073/57804/79184/6118/7517/9577/5893/5892/6117/5425/79728/80198/10714/10111/5424/29086/8940
hsa00450	Selenocompound metabolism	17	-0.646157	-1.8758	0.0010447	0.0062492	0.00437874	5249	tags=76%, list=27%, signal=56%	51540/9061/4141/51091/56267/4548/92935/114112/22929/883/22928/10587/9060
hsa00620	Pyruvate metabolism	45	-0.494471	-1.77431	0.00114459	0.00672447	0.00471176	5023	tags=53%, list=26%, signal=40%	223/197257/128/3945/5162/5315/97/217/5160/84532/98/9380/4190/1737/38/4199/4200/4191/2271/10327/3029/160287/55902/224
hsa05145	Toxoplasmosis	110	0.285571	1.55306	0.00131586	0.00759504	0.00532175	3262	tags=33%, list=17%, signal=27%	2773/10105/4792/5970/3909/3914/7124/3949/2775/54205/7189/5606/3460/3458/3592/4790/6774/7040/8651/3123/3459/23533/6772/3117/3127/3119/5294/23118/23643/958/7099/3126/1147/330/345611/3303
hsa05150	Staphylococcus aureus infection	72	0.326637	1.61003	0.00142486	0.00808239	0.00566323	4316	tags=44%, list=22%, signal=35%	3383/3880/728/3426/2215/2358/102723407/2357/25984/3123/5724/3117/3127/3119/2266/4153/716/2212/5340/3126/718/629/3858/2204/3075/3866/192666/6403/3872/3861/3860/3868
hsa04660	T cell receptor signaling pathway	101	0.293675	1.57766	0.00153194	0.00854252	0.00598564	2434	tags=26%, list=13%, signal=23%	8915/5295/1493/5534/1326/4794/4792/5970/29851/7124/3558/4893/3937/1437/3458/5894/940/4790/998/5533/8440/5530/5588/5535/5290/927
hsa03460	Fanconi anemia pathway	54	-0.456168	-1.69827	0.00156288	0.00856977	0.00600473	7748	tags=63%, list=40%, signal=38%	641/29089/5889/57697/55215/91442/672/378708/7156/7398/116028/83990/5395/4292/2189/80233/2188/6118/11201/9894/6117/5429/51426/79728/80198/2176/197342/201254/84464/2067/2072/8940/2178/80010
hsa04976	Bile secretion	85	0.312228	1.60822	0.00164243	0.00885834	0.00620693	2441	tags=24%, list=13%, signal=21%	9971/366/5568/8431/3949/6555/79799/570/7365/483/3156/64241/10599/6548/476/6580/10864/54578/6513/1581
hsa05320	Autoimmune thyroid disease	49	0.376248	1.71833	0.00173446	0.00920385	0.00644903	3202	tags=33%, list=17%, signal=27%	1493/355/102723407/3558/941/940/7253/3123/3117/3127/3119/7038/958/3126/3133/3105
hsa05160	Hepatitis C	149	0.254279	1.44952	0.00183971	0.0096074	0.00673179	2998	tags=28%, list=15%, signal=23%	1499/5515/5295/355/148022/23562/4792/5970/7534/7124/3949/9451/54205/7189/4893/91543/3434/3458/5894/1364/5520/4790/9074/6774/9021/5519/637/1026/7531/4609/6772/5290/4599/10971/4600/1365/8837/3627/5610/7098/23586
hsa03013	RNA transport	158	-0.358244	-1.52755	0.00193605	0.00995252	0.00697361	4620	tags=36%, list=24%, signal=28%	10605/8891/57510/3646/1978/9669/26019/23225/10799/81929/8664/1968/51808/80145/8667/79023/9470/23511/22985/79228/2733/25929/9688/1965/57122/10073/1207/10940/10248/348995/7514/8893/23636/10557/79902/138716/55706/10762/65109/57187/8890/65110/55520/11097/8894/8086/79833/84305/60528/8666/51367/9513/1967/8662/54913/79760/8021
hsa05143	African trypanosomiasis	37	0.415877	1.76338	0.00225804	0.0114292	0.00800829	1350	tags=27%, list=7%, signal=25%	3553/7412/3383/355/3569/7124/102723407/3250/3458/3592
hsa03420	Nucleotide excision repair	45	-0.477065	-1.71185	0.00234604	0.0116946	0.0081943	3944	tags=47%, list=20%, signal=37%	5985/57804/56655/9978/6118/5982/1161/2967/1069/6117/5425/10714/2071/5426/5424/2067/7508/8451/2072/404672/2068
hsa03040	Spliceosome	129	0.258746	1.45244	0.00290994	0.0142891	0.0100122	2467	tags=25%, list=13%, signal=22%	3190/7307/4116/10569/220988/10285/10189/51729/6627/1659/51639/84844/3183/51340/10772/100534599/55696/988/6637/6628/8896/22938/4670/6430/3192/25949/55119/29896/10286/84950/51503/57461
hsa05120	Epithelial cell signaling in Helicobacter pylori infection	67	0.322502	1.55216	0.00300098	0.0145194	0.0101736	1732	tags=21%, list=9%, signal=19%	2921/3576/2920/2919/4792/5970/527/1839/245973/3577/3579/4790/50848/998
hsa05203	Viral carcinogenesis	197	0.233953	1.36937	0.00330977	0.0157814	0.0110578	2012	tags=19%, list=10%, signal=17%	1960/3190/9261/5295/1233/2033/4792/5970/1654/5568/7534/6722/4791/5423/1387/5966/8347/4893/2959/5700/84699/7874/5366/7185/4790/6774/8370/728340/22938/998/8850/894/1108/1388/1026/10488/2965/7531
hsa04640	Hematopoietic cell lineage	98	0.290824	1.55157	0.0034	0.01598	0.011197	2794	tags=26%, list=14%, signal=22%	3553/1604/7037/7850/3552/3569/7124/102723407/1435/4311/1440/966/1437/3554/921/3123/3559/3574/3117/3127/3119/927/3675/1441/925
hsa05235	PD-L1 expression and PD-1 checkpoint pathway in cancer	88	0.287633	1.48836	0.00362845	0.0168135	0.011781	2327	tags=27%, list=12%, signal=24%	3091/5295/5534/4794/148022/4792/5970/29126/7189/5606/4893/3460/3458/5894/940/4790/6774/5533/3459/5530/5588/5535/6772/5290
hsa01212	Fatty acid metabolism	56	-0.425069	-1.59222	0.00400084	0.0182816	0.0128097	3803	tags=39%, list=20%, signal=32%	201562/197322/10449/83401/51102/9415/3030/38/64834/30/36/3295/37/3032/9524/3992/35/84869/34/1892/8310/1376
hsa00511	Other glycan degradation	17	-0.602035	-1.74771	0.00411786	0.0185586	0.0130038	6441	tags=88%, list=33%, signal=59%	23324/2629/3074/2519/4123/2720/284004/64772/57704/4125/175/4126/2517/3073/10825
hsa00071	Fatty acid degradation	41	-0.463289	-1.63199	0.00432076	0.0188409	0.0132016	5023	tags=51%, list=26%, signal=38%	223/128/3033/217/10449/1632/3030/38/30/36/37/10455/3032/113612/35/34/1892/8310/2639/224/1376
hsa04350	TGF-beta signaling pathway	90	0.28107	1.47558	0.00434065	0.0188409	0.0132016	2029	tags=22%, list=10%, signal=20%	7057/5515/10468/2033/7124/3625/269/1387/57154/6500/392255/3626/3458/7050/7040/4838/64388/5519/3398/4609
hsa00920	Sulfur metabolism	10	-0.699326	-1.7428	0.00435231	0.0188409	0.0132016	1142	tags=40%, list=6%, signal=38%	23474/6821/10380/9060
hsa00563	Glycosylphosphatidylinositol (GPI)-anchor biosynthesis	24	-0.540035	-1.69092	0.00441726	0.0188738	0.0132246	4868	tags=58%, list=25%, signal=44%	9091/23556/2822/5281/84720/8818/55650/94005/9487/51227/8733/80235/93183/54872
hsa04066	HIF-1 signaling pathway	106	0.272465	1.47396	0.00449373	0.0189543	0.0132811	2608	tags=28%, list=13%, signal=25%	5209/3091/5295/7037/2872/2033/5970/3569/2321/1906/1387/3460/285/3458/3948/7010/4790/5214/6774/7076/3479/1026/3459/6921/816/6513/5230/5290/1977/54583
hsa04024	cAMP signaling pathway	205	0.21977	1.30165	0.0053058	0.021965	0.0153906	2352	tags=19%, list=12%, signal=16%	2773/2867/5142/4852/5144/135/5295/8843/338442/2033/4792/5970/5568/2905/5020/1906/1387/5500/5733/1907/490/1258/5894/84699/483/7253/4790/22800/3362/5350/6548/476/10488/1816/6262/816/5290/6662
hsa04658	Th1 and Th2 cell differentiation	89	0.280221	1.45677	0.00534103	0.021965	0.0153906	3245	tags=33%, list=17%, signal=27%	5534/4794/4792/5970/3558/3460/3458/3592/4790/4094/3561/3123/5533/3559/3459/5530/864/5588/5535/6772/3117/3127/3119/6775/6777/3126/2625/1147/10683
hsa01210	2-Oxocarboxylic acid metabolism	18	-0.595047	-1.74681	0.00561106	0.0226423	0.0158652	5047	tags=56%, list=26%, signal=41%	2875/84706/3419/50/3417/162417/3421/2806/587/1431
hsa03030	DNA replication	36	-0.485937	-1.67394	0.00564337	0.0226423	0.0158652	7510	tags=61%, list=39%, signal=37%	4171/5427/1763/5984/5111/4174/4176/84153/23649/5985/57804/56655/6118/4172/5982/5557/6117/5425/10714/5426/5424/10535
hsa00230	Purine metabolism	126	-0.357366	-1.48607	0.0063116	0.0250183	0.01753	6792	tags=48%, list=35%, signal=32%	5167/4881/29922/26289/2982/114/4833/5140/51816/3614/4907/55276/10846/2986/50940/956/5151/272/2272/9061/10606/5150/5146/1716/5145/51292/30833/5137/5315/55811/4832/471/5152/11164/111/204/4882/8833/5147/113/3000/5634/318/957/8622/84284/5198/2618/53343/122622/374659/955/5148/3704/353/158/10201/5158/131870/9060/55821
hsa04672	Intestinal immune network for IgA production	49	0.348654	1.5923	0.00678587	0.026578	0.0186229	2999	tags=35%, list=16%, signal=29%	7852/29851/3569/102723407/3558/941/940/7040/3123/102723996/23308/3117/3127/3119/5284/958/3126
hsa00510	N-Glycan biosynthesis	49	-0.438548	-1.60919	0.00699789	0.0267789	0.0187637	3815	tags=39%, list=20%, signal=31%	3703/1603/57171/79053/84620/84920/79644/54344/57134/29929/144245/8818/8703/4247/199857/4245/7841/10195/1798
hsa05418	Fluid shear stress and atherosclerosis	135	0.249362	1.41358	0.00699996	0.0267789	0.0187637	1536	tags=16%, list=8%, signal=15%	3553/1499/7412/5295/7850/3383/3552/6385/4780/5970/387082/6382/4217/7124/6347/1906/7341/3458/119391/1843/3554/4790
hsa03430	Mismatch repair	23	-0.533948	-1.66263	0.00793657	0.030013	0.0210297	4756	tags=61%, list=25%, signal=46%	2956/5984/5111/5395/4292/5985/57804/6118/5982/6117/5425/4436/10714/5424
hsa00020	Citrate cycle (TCA cycle)	29	-0.510738	-1.68058	0.00843869	0.0315492	0.0221061	4931	tags=55%, list=25%, signal=41%	6389/5162/8803/3419/47/50/5160/4190/1737/6391/4191/3417/2271/3421/8802/1431
hsa00270	Cysteine and methionine metabolism	50	-0.430777	-1.58944	0.0103821	0.0383787	0.0268915	5409	tags=50%, list=28%, signal=36%	4144/113675/2730/3945/2729/1788/27430/56267/4548/6723/1789/4507/4190/191/4191/1786/23382/883/2806/51074/587/160287/10768/2937/84245
hsa05169	Epstein-Barr virus infection	196	0.217946	1.2761	0.0107362	0.0392466	0.0274996	3526	tags=29%, list=18%, signal=24%	7128/5295/3383/4794/355/4792/5970/3569/4791/7124/102723407/54205/7189/3280/9541/5971/5606/5700/2923/7874/4790/5713/6774/9636/22938/3123/894/637/1026/4609/864/6772/4193/9861/811/5290/3117/3127/3119/23118/3627/4067/10018/5610/958/23586/3126/1147/3133/3105/3665/4940/4616/1647/898/1027/7097
hsa04621	NOD-like receptor signaling pathway	169	0.227417	1.31162	0.011085	0.0400766	0.0280812	2292	tags=22%, list=12%, signal=19%	3553/2921/114548/10135/8767/7128/23710/3576/2920/2919/2634/84557/148022/4792/5970/3569/2633/7124/6347/115362/7189/10010/171389/4790/81631/24145/643246/7417/7158/3320/7531/837/11345/388646/3326/6772/440068
hsa04216	Ferroptosis	40	0.355661	1.56481	0.0112201	0.0401239	0.0281144	1938	tags=30%, list=10%, signal=27%	6303/7037/84557/2495/2180/5621/64116/23657/81631/2181/643246/7417
hsa03020	RNA polymerase	31	-0.479005	-1.60592	0.0115156	0.0407381	0.0285447	4558	tags=42%, list=24%, signal=32%	5438/11128/5431/25885/51728/5433/5441/51082/84265/10623/5436/5437/5434
hsa05166	Human T-cell leukemia virus 1 infection	217	0.214878	1.31519	0.0119923	0.041973	0.02941	2446	tags=23%, list=13%, signal=20%	2114/5295/293/7850/3383/5534/7538/2033/4792/5970/5568/6722/3569/4791/7124/5423/3558/10524/1387/5971/4893/1437/8061/84699/3554/4790/3561/7040/8850/3123/5533/894/4085/3559/1388/4214/1026/10488/7417/200186/4609/5530/5535/6513/811/5290/3117/3127/3119/1959
